# Supplementary material for: Using the Heavy Metal Indices and Benthic Indices to Assess the Ecological Quality in the Tidal Flats of Garolim Bay, South Korea
Source: MDPI journal article supplement (doi:10.3390/w16050736), 2024-02-29
Supplement: s1 [file s1]

**Table S1.** Categorisation of macrobenthos into ecological groups for the AMBI.

| Species                         | AMBI groups |
|---------------------------------|-------------|
| <i>Abludomelita</i> sp.         | EGIII       |
| <i>Allorchestes</i> sp.         | EGII        |
| <i>Alpheus bisincisus</i>       | EGII        |
| <i>Alpheus japonicus</i>        | EGII        |
| <i>Alpheus</i> sp.              | EGII        |
| <i>Ampharete</i> sp.            | NA          |
| <i>Ampithoe</i> sp.             | EGI         |
| <i>Angustassiminea castanea</i> | EGII        |
| <i>Arcotheres sinensis</i>      | EGIII       |
| <i>Arcuatula senhousia</i>      | EGIII       |
| <i>Aricidea</i> sp.             | EGII        |
| <i>Batillaria cumingii</i>      | EGII        |
| <i>Bullacta caurina</i>         | EGVI        |
| <i>Capitella capitata</i>       | EGV         |
| <i>Ceratonereis mirabilis</i>   | EGII        |
| <i>Circulus duplicatus</i>      | EGI         |
| <i>Cirolana</i> sp.             | EGII        |
| <i>Cirratulus cirratus</i>      | EGIV        |
| <i>Clymenella koreana</i>       | EGI         |
| <i>Decorifer insignis</i>       | EGII        |
| <i>Diastylis</i> sp.            | EGI         |
| <i>Dimorphostylis</i> sp.       | EGI         |

---

|                                    |       |
|------------------------------------|-------|
| <i>Dosinia japonica</i>            | EGI   |
| <i>Eteone longa</i>                | EGIII |
| <i>Euchone alicaudata</i>          | EGII  |
| <i>Eumida sanguinea</i>            | EGII  |
| <i>Exolaternula spengleri</i>      | EGI   |
| <i>Felaniella sowerbyi</i>         | EGII  |
| <i>Gammarus</i> sp.                | EGI   |
| <i>Glycera chirori</i>             | EGII  |
| <i>Glycera decipiens</i>           | EGII  |
| <i>Goniada japonica</i>            | EGII  |
| <i>Grandifoxus</i> sp.             | EGI   |
| <i>Harmothoe forcipata</i>         | EGII  |
| <i>Haustorioides</i> sp.           | EGII  |
| <i>Hediste japonica</i>            | EGIII |
| <i>Helicana wuana</i>              | EGII  |
| <i>Hemigrapsus penicillatus</i>    | EGII  |
| <i>Heteromastus filiformis</i>     | EGIV  |
| <i>Hima fratercula hiradoensis</i> | NA    |
| <i>Ilyoplax pingi</i>              | EGIII |
| <i>Ischnochiton comptus</i>        | EGII  |
| <i>Kuwaita heteropoda</i>          | EGII  |
| <i>Lagis bocki</i>                 | EGI   |
| <i>Laguncula pulchella</i>         | EGII  |
| <i>Laonice cirrata</i>             | EGII  |

---

---

|                                            |       |
|--------------------------------------------|-------|
| <i>Laonice</i> sp.                         | EGIII |
| Laqueidae unid.                            | NA    |
| <i>Laternula anatina</i>                   | EGI   |
| <i>Laternula boschasina</i>                | EGI   |
| <i>Laternula gracilis</i>                  | EGI   |
| <i>Lepidozona coreanica</i>                | EGII  |
| <i>Leptochela sydniensis</i>               | EGIII |
| <i>Leptochelia</i> sp.                     | EGIII |
| Leptoplanidae                              | NA    |
| <i>Lottia kogamogai</i>                    | EGII  |
| <i>Iridona iridescens</i>                  | EGI   |
| <i>Lumbrineris japonica</i>                | EGII  |
| <i>Lumbrineris</i> sp.                     | NII   |
| <i>Lunella correensis</i>                  | NA    |
| <i>Macrophthalmus (Mareotis) japonicus</i> | EGI   |
| <i>Maera</i> sp.                           | EGI   |
| <i>Magelona japonica</i>                   | EGI   |
| <i>Maldane cristata</i>                    | EGI   |
| <i>Mediomastus californiensis</i>          | EGIII |
| Megalopa                                   | NA    |
| <i>Metharpinia</i> sp.                     | EGIII |
| <i>Microclymene propecaudata</i>           | EGI   |
| <i>Moerella hilaris</i>                    | EGI   |
| <i>Monocorophium</i> sp.                   | EGIII |

---

---

|                                |       |
|--------------------------------|-------|
| Mysidacea unid.                | EGII  |
| <i>Nassarius livescens</i>     | EGII  |
| Nematoda unid.                 | EGIII |
| Nemertea unid.                 | EGIII |
| <i>Nephtys caeca</i>           | EGII  |
| <i>Nephtys polybranchia</i>    | EGII  |
| <i>Nereis longior</i>          | EGIII |
| <i>Nitidotellina lischkei</i>  | EGIII |
| <i>Niveotectura pallida</i>    | NA    |
| <i>Orchomene</i> sp.           | EGII  |
| <i>Oxydromus</i> sp.           | EGII  |
| <i>Paralacydonia paradoxa</i>  | EGII  |
| <i>Paraleonnates uschakovi</i> | EGIII |
| Paranthuridae unid.            | EGIII |
| <i>Paraprionospio pinnata</i>  | EGIV  |
| <i>Patelloida conulus</i>      | NA    |
| <i>Perinereis aibuhitensis</i> | EGIII |
| <i>Perinereis cultrifera</i>   | EGIII |
| <i>Perinereis nuntia</i>       | EGIII |
| <i>Philyra kanekoi</i>         | EGII  |
| <i>Phyllodoce koreana</i>      | EGII  |
| <i>Polydora</i> sp.            | EGIV  |
| <i>Potamocorbula</i> sp.       | EGV   |
| <i>Praxillella pacifica</i>    | EGI   |

---

---

|                                        |       |
|----------------------------------------|-------|
| <i>Prionospio japonica</i>             | EGIV  |
| <i>Protankyra bidentata</i>            | EGII  |
| <i>Pseudoleucon</i> sp.                | NA    |
| <i>Pseudopolydora paucibranchiata</i>  | EGIV  |
| <i>Ruditapes philippinarum</i>         | EGIII |
| <i>Schistomeringos matsushimaensis</i> | EGIV  |
| <i>Scoletoma nipponica</i>             | EGII  |
| <i>Scoloplos armiger</i>               | EGIII |
| <i>Sigambra hanaokai</i>               | EGII  |
| <i>Sinonovacula constricta</i>         | EGII  |
| <i>Spio borealis</i>                   | EGIII |
| <i>Spiophanes bombyx</i>               | EGIII |
| <i>Sternaspis scutata</i>              | EGIII |
| <i>Striarca symmetrica</i>             | EGI   |
| <i>Synchelidium</i> sp.                | EGI   |
| <i>Tambalagamia fauveli</i>            | EGII  |
| <i>Tharyx</i> sp.                      | EGIV  |
| <i>Theora lata</i>                     | EGIV  |
| <i>Travisia</i> sp.                    | EGI   |
| <i>Tubuca arcuata</i>                  | EGI   |
| <i>Typosyllis variegata</i>            | EGII  |
| <i>Umbonium thomasi</i>                | EGII  |
| <i>Urothoe</i> sp.                     | EGI   |
| Zoea                                   | NA    |

---

EGI: disturbance-sensitive species; EGII: disturbance-indifferent species; EGIII: disturbance-tolerant

species; EGIV: second-order opportunistic species; EGV: first-order opportunistic species; NA: not assigned
