# Supplementary material for: Using the Heavy Metal Indices and Benthic Indices to Assess the Ecological Quality in the Tidal Flats of Garolim Bay, South Korea
Source: MDPI journal article supplement (doi:10.3390/w16050736), 2024-02-29
Supplement: s1 [file s1]

**Table S3.** The threshold of Kappa analysis.

| Kappa values | The level of agreement |
|--------------|------------------------|
| $\leq 0.05$  | Null                   |
| 0.051–0.20   | Very low               |
| 0.21–0.40    | Low                    |
| 0.41–0.55    | Moderate               |
| 0.56–0.70    | Good                   |
| 0.71–0.85    | Very good              |
| 0.86–0.99    | Almost perfect         |
| 1.0          | Perfect                |
