# Supplementary material for: Using the Heavy Metal Indices and Benthic Indices to Assess the Ecological Quality in the Tidal Flats of Garolim Bay, South Korea
Source: MDPI journal article supplement (doi:10.3390/w16050736), 2024-02-29
Supplement: s1 [file s1]

**Table S2.** Categorisation of the dominant macrobenthos into functional groups for the BPI.

| Species                           | BPI groups |
|-----------------------------------|------------|
| <i>Aricidea</i> sp.               | N2         |
| <i>Goniada japonica</i>           | N1         |
| <i>Heteromastus filiformis</i>    | N4         |
| <i>Ilyoplax pingi</i>             | N2         |
| <i>Lumbrineris japonica</i>       | N3         |
| <i>Macrophthalmus japonicus</i>   | N2         |
| <i>Mediomastus californiensis</i> | N4         |
| Nemertea unid.                    | N3         |
| <i>Nephtys polybranchia</i>       | N1         |
| <i>Ruditapes philippinarum</i>    | N1         |

N1: filter feeders or large carnivores; N2: surface deposit feeders or small carnivores; N3: subterranean deposit feeders; N4: opportunistic species.
