# Supplementary material for: Using the Heavy Metal Indices and Benthic Indices to Assess the Ecological Quality in the Tidal Flats of Garolim Bay, South Korea
Source: MDPI journal article supplement (doi:10.3390/w16050736), 2024-02-29
Supplement: s1 [file s1]

**Table S7.** Kappa values, match percentages, and levels of agreement, for the level of risk and ecological status across index combinations utilised in this research.

| Indices                | Kappa value | %Match | Levels of agreement |
|------------------------|-------------|--------|---------------------|
| AMBI/BENTIX            | 0.504       | 71.43  | Moderate            |
| AMBI/BOPA              | 0.642       | 79.59  | Good                |
| AMBI/BPI               | 0.317       | 59.18  | Low                 |
| AMBI/M-AMBI            | 0.31        | 67.35  | Low                 |
| AMBI/PLI               | 0.014       | 38.78  | Null                |
| AMBI/ $PI_{Nemerow}$   | 0           | 65.31  | Null                |
| BENTIX/BOPA            | 0.664       | 83.67  | Good                |
| BENTIX/BPI             | 0.434       | 75.51  | Fair                |
| BENTIX/M-AMBI          | 0.343       | 67.35  | Low                 |
| BENTIX/PLI             | -0.021      | 59.18  | Null                |
| BENTIX/ $PI_{Nemerow}$ | 0           | 36.73  | Null                |
| BOPA/BPI               | 0.569       | 79.59  | Good                |
| BOPA/M-AMBI            | 0.346       | 67.35  | Low                 |
| BOPA/PLI               | 0.116       | 59.18  | Very Low            |
| BOPA/ $PI_{Nemerow}$   | 0           | 44.9   | Null                |
| BPI/M-AMBI             | 0.258       | 63.27  | Low                 |
| BPI/ PLI               | 0.007       | 71.43  | Null                |
| BPI/ $PI_{Nemerow}$    | 0           | 24.49  | Null                |
| M-AMBI/PLI             | -0.078      | 46.94  | Null                |
| M-AMBI/ $PI_{Nemerow}$ | 0           | 48.98  | Null                |
| PLI/ $PI_{Nemerow}$    | 0           | 12.24  | Null                |
